# Supplementary material
Source: MDPI journal article supplement (https://www.mdpi.com/1999-4907/12/11/1537)
Supplement: s1 [file s1]

**Table S1:** The degree of infestation of *Aesculus hippocastanum* trees as a result of *Camararia ohridella* larval activity

|                        | 95 | 102 | 109 | 116 | 123 | 130 | 137 | 144 | 158 | 172 | 186 | 200 | 214 | 228 | 242 | 256 | 270 |
|------------------------|----|-----|-----|-----|-----|-----|-----|-----|-----|-----|-----|-----|-----|-----|-----|-----|-----|
| Control trees          |    |     |     |     |     |     |     |     |     | 1   | 1   | 1   | 2   | 2   | 2/3 | 3   | 3   |
| Heavily infested trees |    |     |     |     |     |     |     | 1   | 1   | 2   | 2   | 2   | 2/3 | 3   | 3   | 3   | 3   |

Stage 1 – the appearance of the first mines; Stage 2 – the majority of leaf blades are green but with long mines; Stage 3 – the numerous mines resulting in browning of leaf blades; dry leaflets are fallen
